# Supplementary material for: Preliminary evaluation of the efficacy and safety of a traditional poly-herbal preparation “Desadun Kalka” in reducing symptoms and inflammatory mediators in patients with acute COVID-19
Source: Research Square preprint supplement (doi:10.21203/rs.3.rs-5966181/v1), 2025-02-27
Supplement: Supplementary file 1 [file 0fdcdbeea49f6f42dbc84e9e.docx]

| Title | Assessment of efficacy of the Indigenous poly herbal drug “Desandun Kalka” against SARS-CoV- 2 infection |
| --- | --- |
| Principal Investigator | Dr.Rameeladevi Thatparan : Bandaranaike Memorial Ayurveda  Research Institute |
| Investigators | 1. Dr. L. H. S. Umayangani : Bandaranaike Memorial Ayurveda Research Institute 2. Prof. Neelika Malavige: Department of Immunology and Molecular Medicine, University of Sri Jayewardenepura 3. Dr. Ananda Wijewickrama: National Infectious Diseases Hospital, Sri Lanka 4. Dr. Chandima Jeewendra: Department of Immunology and Molecular Medicine,y University of Sri Jayewardenepura   Dr. Damayanthi Idampitiya – National Infectious Diseases Hospital, Sri Lanka   1. Prof. A.P.G. Amarasinghe : Institute of Indigenous Medicine |
| Sponsor: | Bandaranaike Memorial Ayurveda Research Institute, Nawinna, Maharagama. |
| Funder: | Department of Ayurveda, State Ministry of Indigenous Medicine Promotion, Rural and Ayurvedic Hospitals Development and Community Health |

Confidentiality Statement

This document contains confidential information that must not be disclosed to anyone other than the Sponsor, the Investigator Team, and members of the Research Ethics Committee, unless authorized to do so.

# TABLE OF CONTENTS

1. [KEY TRIAL CONTACTS 3](#_bookmark0)
2. [SYNOPSIS 4](#_bookmark1)
3. [ABBREVIATIONS 4](#_bookmark2)
4. [BACKGROUND AND RATIONALE 6](#_bookmark3)
5. [OBJECTIVES AND OUTCOME MEASURES 8](#_bookmark4)

[Primary Study Endpoints](#_bookmark5) 8

1. [TRIAL DESIGN 9](#_bookmark6)
2. PARTICIPANT IDENTIFICATION ............................. ………………………………….... [8 TRIAL PROCEDURES](#_bookmark7)  10
   1. [Recruitment](#_bookmark8) 10
   2. [Informed consent 10](#_TOC_250000)

[8.3.Randomisation,](#_bookmark9) 10

[8.4 Base line assessment 12](#_bookmark10)

1. [INVESTIGATIONAL MEDICINAL PRODUCT (IMP) 12](#_bookmark11)
   1. [IMP Description 12](#_bookmark12)
   2. [Storage of IMP](#_bookmark13) 12
   3. Compliance of Trial Treatment 12
   4. [Concomitant Medication](#_bookmark14) 12
   5. [Post-trial Treatment](#_bookmark15) 12
2. [SAFETY REPORTING](#_bookmark16) 12
3. [STATISTICS](#_bookmark17) 13
   1. Description of Statistical Methods 13
   2. [The Number of Participants 13](#_bookmark18)
   3. [Criteria for the Termination of the Trial 13](#_bookmark19)
   4. [Procedure for Accounting for Missing, Unused, and Spurious Data. 13](#_bookmark20)
   5. [Inclusion in Analysis 13](#_bookmark21)
   6. [Procedures for Reporting any Deviation(s) from the Original Statistical Plan 13](#_bookmark22)
4. [DATA MANAGEMENT 14](#_bookmark23)
   1. [Source Data 14](#_bookmark24)
   2. [Access to Data 14](#_bookmark25)
   3. [Data Recording and Record Keeping 14](#_bookmark26)
5. [QUALITY ASSURANCE PROCEDURES 14](#_bookmark27)
6. [SERIOUS BREACHES 14](#_bookmark28)
7. [ETHICAL AND REGULATORY CONSIDERATIONS 15](#_bookmark29)
   1. [Declaration of Helsinki](#_bookmark30) 15
   2. [Approvals 15](#_bookmark31)15
   3. [Reporting](#_bookmark32) 15
   4. [Participant Confidentiality 15](#_bookmark33)
   5. [Expenses and Benefits 15](#_bookmark34)
8. [FINANCE 15](#_bookmark35)
9. [PUBLICATION POLICY 15](#_bookmark36)
10. [REFERENCES 16](#_bookmark37)

# KEY TRIAL CONTACTS

| Chief Investigator | Dr. Rameeladevi Thatparan, Bandaranayaka Memorial Ayurveda Research Institute, Nawinna, Maharagama.  Email: [rameela10@gmail.com](mailto:rameela10@gmail.com) Phone :+94 777317696 |
| --- | --- |
| Sponsor | Bandaranaike Memorial Ayurveda Research Institute. Nawinna, Maharagama  [Email:bmarioffice@gmail.com](mailto:bmarioffice@gmail.com) Phone:+94 112850 333 |
| Statistician | Dr.S. G. Kisholorjan  Email: [sgkisholorjan@yahoo.com](mailto:sgkisholorjan@yahoo.com) Phone: 0773973880 |
| Committees | Prof. Renu Wickramasinghe: Chairperson, Ethics Review Committee, Faculty of Medical Sciences, University of Sri Jayewardenapura  Email: [renuwick@gmail.com](mailto:renuwick@gmail.com) Phone: 0777571821 |

# SYNOPSIS

| Trial Title | Assessment of efficacy of the Indigenous poly herbal drug “Desandun Kalka” against SARS-CoV- 2 infection | |
| --- | --- | --- |
| Short title | Poly Herbal Formula for treatment of patients with COVID -19 | |
| Clinical Phase | Phase 2 | |
| Trial Design | Randomized, open label | |
| Trial Participants | Patients with Covid -19 infection | |
| Planned Sample Size | 152 with 76 each in each study arm | |
| Treatment duration | 10 days | |
| Follow up duration | 28 days of illness | |
| Planned Trial Period | 6 months | |
|  | Objectives | Outcome Measures |
| Primary | To evaluate the efficacy of ‘Desadun Kalka (DK)’ in  reducing the severity and  duration of symptoms in COVID-19 infection. | The reduction in duration of symptoms (fever, cough, sore throat and anosmia). |
|  |  |  |
| Secondary | To study the effects of DK on clinical progression using the WHO ordinal outcome scale.  To study the effects of DK on duration of viral shedding by measuring viral RNA of SARS-COV-2 as from nasopharyngeal swabs. by RT-PCR, which is an indirect indicator of viral loads  3. To study the effects of DK on resolution of the main symptoms of COVID- 19 (i.e. fever, cough, sore throat and anosmia  4. To study the effects of DK on haematological and biochemical Parameters  5. Evaluate any adverse effects of the drug DK | Assessing the Ordinal Scale for Clinical Improvement (WHO – Outcome scale, World Health Organization 2020)  Performing PCR tests at the day of admission (Day 1) and the day of discharge (Day 10) in those whose symptoms have fully resolved.  3. Fever: Number of days taken for the patient to be afebrile.  Cough: reduction in frequency and duration of cough, sore throat: the number of days that individuals have a sore throat Anosmia: number of days for resolution of anosmia  4. Extent of lymphocytopenia by assessing the full blood count, and the degree of inflammation by evaluation of inflammatory markers (CRP, ESR)  Any adverse effects of DK will be assessed by carrying FBC, liver function tests (AST, ALT) and renal function tests (GFR, Serum creatinine).on day 01, day10 & day 28 |
| Investigational Medicinal Product(s) | DK -1250mg | Investigational Medicinal Product(s) |

# ABBREVIATIONS

| AE | Adverse event |
| --- | --- |
| AR | Adverse reaction |
| CRF | Case Report Form |
| CT | Clinical Trials |
| Ct | Cycle threshold value |
| DK | Desandun Kalka |
| DSMB | Data Safety Monitoring Board |
| ERC | Ethic Review Committee |
| GCP | Good Clinical Practice |
| GP | General Practitioner |
| ICF | Informed Consent Form |
| OPD | Out patients department |
| PI | Principal Investigator |
| PIL | Participant/ Patient Information Leaflet |
| SAE | Serious Adverse Event |
| SAR | Serious Adverse Reaction |
| SCOCT | Sub Committee on Clinical Trials |
| SLCTR | Sri Lanka Clinical Trial Registry |
| SUSAR | Suspected Unexpected Serious Adverse Reactions |
| USJ | University of Sri Jayewardenepura |
| BMARI | Bandaranaike Memorial Ayurveda Research Institute |
| NIID | National Institute of Infectious Disease |

# BACKGROUND AND RATIONALE

Coronavirus disease (COVID-19) is caused by SARS-COV2 and represents the causative agent of a potentially fatal disease that is of great global public health concern. Novel corona -virus induced pneumonia, which was named as coronavirus disease 2019 (COVID-2019) by the WHO on the February 11, 2020, has rapidly increased in epidemic scale since it first appeared in Wuhan, China, in December 2019. According to the latest data, up to the December 8th , 2020 the number of confirmed cases in world-wide around 67 862 910 of which 1 548 912

were dead and 46 950 527 were recovered.i

There is no safe and effective antiviral drug or vaccine to be used against COVID-19. However, few broad-spectrum antiviral drugs have been evaluated against COVID-19 in clinical trials, resulted in clinical recovery, in which the only option available is using antiviral drugs and corticosteroid Dexamethasone are currently in practice for COVID 19 patients.ii . Therefore, it is clear, that more research is urgently needed to identify the novel chemotherapeutic drugs for targeting COVID-19 infections.

There are some poly-herbal preparations already being used to treat communicable and non- communicable diseases, of which some are identified as having antiviral properties. Desadun kalka Kalka (DK) also known as “Ratha Kalka” is a popular poly herbal compound prescribed routinely for neonates by physicians of Indigenous system of medicine for several hundreds of years to enhance their immunity against Rakthaja Roga (diseases caused by vitiated blood). It is given to neonates from two weeks of birth for one month duration, where the body weight of neonate is within the normal range. DK has been used as a preventive treatment for respiratory infections and skin rashes and curative treatment for fever, inflammation, respiratory diseases and skin diseases as well.

Adverse effects: So far, no adverse effects or reactions have been recorded. Since it is given to infants for hundreds of years, if such adverse effects occurred, those would have been reported and highlighted.

**Justification of the drug been selected for this study**

Infants who were given DK, were shown to have higher levels of antibodies than those who were not. For instance, the levels of serum Immunoglobulins (IgG, IgA and IgM) were

significantly increased within reference ranges in cord blood. This study assessed the effect of DK neonates (n=20) after two months administration of Desadun kalka (DK) and control group (n=20) which were not given DK. IgA levels were measured by a Single Radial Immuno- diffusion technique after 2 months of administration of DK.. iii.

Desadun kalka was tested in animals to determine the toxic effects. Thirty Belgium strain white rabbits (weight 900-1000g) were randomized into three groups of ten each compromising an equal number of male and female rabbits. The animals were observed for any macroscopical changes and histopathological examination of targeted organs. This study concluded that the polyherbal preparation did not show any evidence of toxicity when tested on rabbits.iv

This poly herbal drug was evaluated for its anti-inflammatory effects by using Sparggue Dawley albeno rats. Rathakalka showed its highest anti-inflammatory activity at 3 hours after induction of edema (p<0.05, students’t-test) while Ibuprofen elicited its maximum activity at 5 hours after carageenan treatment (p<0.01) .v

In another study the anti-pyretic effects of Desadun kalka on Wistar strain albino rats, who were infected with yeast was assessed. This poly herbal drug had the capacity to reduce yeast induced elevation of the body temperature in rats. The anti-pyretic effect started as early as one hour after drug administration, and effect was maintained for 4 hours. The results obtained from both, standard drug paracetamol and Rathakalka treated group were compared with the control group. A significant reduction (p<0.01) in the yeast-infection induced rectal temperature was observed. vi.

This poly herbal drug is being used as a curative measure for fever, some skin diseases and respiratory disorders. One of the main causes for above disease conditions is bacterial infection. Antimicrobial effect of DK was evaluated on cultures of Staphylococcus aureus, Pseudomonas aeruginosa, and Listeria monoytogenes and coliforms including salmonella. The study showed DK inhibited the growth of Coliforms or Salmonella.vii The anti-bacterial assays was performed using the cylinder plate method in nutrient agar and incubated for 48 hours at room temperature. A clear inhibition zone were observed repeatedly in all plates, indicating that the water extract of Rathakalka has anti-bacterial effect on Staphylococcus aureus, Psedomonas aeruginosa and Listeria monoytogenesviii

Licorice (Glycyrrhiza glabra) has been used in herbal medicine and as a food supplement worldwide for centuries. Licorice is a common ingredient of several prescriptions of traditional Ayurveda drugs like Desadun kalka (DK). Glycyrrhizin acid extracted in G glabra , inhibit the replication of several viruses included Epstein-Barr virus, Herpes simplex virus, Hepatitis A virus, Hepatitis B virus, Hepatitis C virus, Human cytomegalovirus, Human immunodeficiency virus, Influenza virus, SARS coronavirus and Varicella zoster virus (ref). Radix Glycyrrhizae and Radix Glycyrrhizae Preparata (Chinese traditional medicine) of high concentration could stimulate the secretion of IFN-β, which has multiple anti-viral activities, including inhibition of viral penetration, un-coating, mRNA translation, protein synthesis, genome replication, virus assembly and releasing, to counteract viral infectionix.

Glycyrrhizic acid (GA) is the main active component of Liquorice root. GA shows antiviral, anti-inflammatory activity as well as ability to enhance therapeutic effect of other drug molecules.x Glycyrrhizin can block the ACE2 receptors and also reduce the expression of type 2 trans-membrane serine protease (TMPRSS2) (ref). The inhibition of this enzyme by a protease inhibitor as a therapeutic intervention has been proposed by the authors. TMPRSS2 has been involved in both corona and influenza virus infectionsxi. Interestingly, this expression of this enzyme is regulated by GA, which may account for the broader antiviral effects of Glycyrrhizin (GL).xiiIn-vitro studies have shown antiviral activity of Glycyrrhizin against HIV- 1, SARS related coronavirus, respiratory syncytial virus, arboviruses, vaccinia virus and vesicular stomatitis virus. Compared to antiviral compounds such as ribavirin, 6-azauridine, pyrazofurin, mycophenolic acid, glycyrrhizin was the most potent inhibitor of antiviral activity against two clinical isolates of SARS-associated coronavirus (FFM-1 and FFM-2) isolated from patients.xiiiIn addition to inhibition of virus replication, glycyrrhizin is able to inhibit adsorption and penetration of the virus during the early steps of the replicative cycle. The activity of Glycyrrhizin has been found to be most effective when given both during and after the adsorption period.xiv

Vacha rhizome (Acoruscalamus L. Acoraceae), another active ingredient in DK enhances bone marrow cellularity and viability and lymphocyte proliferation and survival, boosts cell mediated as well as humoral immunity xv.

1. **OBJECTIVES AND OUTCOME MEASURES**

**General Objective**

To evaluate the efficacy of ‘Desadun Kalka (DK)’ in reducing the severity and duration of symptoms in COVID-19 infection.

**Specific objectives**

1. To study the effects of DK on the duration of clinical symptoms using the WHO ordinal outcome scale.

2. To study the effects of DK on duration of viral shedding by measuring viral RNA of SARS- COV-2 from nasopharyngeal swabs. by RT-PCR, & CT value which is an indirect indicator of viral loads.

3. To study the effects of DK on resolution of the main symptoms of COVID-19 (i.e. fever, cough, sore throat and anosmia).

4. To study the effects of DK on hematological and biochemical Parameters

5. Evaluate any adverse effects of the drug DK.

Primary Study Endpoints

The primary end point will be the reduction in duration illness in patients with a confirmed COVID-19 infection, who are treated with DK. A more than 50% reduction in the duration of illness (cough, fever, sore throat & anosmia) will be considered as a significant reduction.

The day of recovery will be defined when all of the following 3 criteria are fulfilled

• When patient is free of sore throat, cough and anosmia

• Patient is afebrile for 72hours

• A negative PCR result at the time of discharge (day 10) with a positive antibody response to COVID-19 (patients are discharged from hospital on day 10 from the date of admission,& antibodies are carried out on day 10 of hospital stay).

In addition, we will also assess, the reduction of the proportion of individuals who develop COVID-19 pneumonia.

Secondary end point

1. The duration of viral shedding and resolution of symptoms will be considered as secondary end points.

The duration of viral shedding will be assessed as follows: SARS-CoV2 real time PCR will be done on NP swabs on day 1 (on admission) and day 10 at the University of Sri Jayewardenepura. The PCR positivity as well as Ct values of the test will be recorded. .

2. Resolution of symptoms of fever, cough, sore throat and anosmia, will be assessed as follows:

Fever: Number of days taken to reduce the fever. Cough: reduction in frequency and duration of cough Sore throat: the number of days to reduce sore throat

Anosmia: Anosmia xviis assessed by Odour identification tests: Odour identification tests are quantitative tests. Patients are asked to identify the odorants at the supra threshold level.

Symptom will be scored daily by the participant perception as experienced during the past 24 hours.accrding to Protocol Number: J2W-MC-PYAB on Covid 19 protocol.xvii

This would consist of several small containers containing substances such as cardamom, xviiigarlic, lemon, and pineapple and a subject is required to identify. The selection of scent and concentration is based on standard “University of Pennsylvania Smell Identification Test” and “Indian smell identification test” (George 2013; Jackman 2005). Smell concentration can be controlled by single or multiple layers of filters put on the lid from where a subject wearing mask is made to smell and identify to rate as below.

Rating Score

None or absent 0

Mild 1

Moderate 2

Severe 3

Assessment of the changes on haematological parameters: Toxic effects (if any) will be revealed: FBC, SGOT, SGPT, GFR & Serum creatinine assessments will be done on the admission of patient (day 01), and at the day of discharge (day 10). The follow-up will be done by contact the patient on 28th day of disease onset. The assays will be done on admission, to determine the patients’ baseline values.

6. TRIAL DESIGN

This study is a randomized, open labelled trial. The efficacy of the drug will be measured by how well it will be able to reduce the proportion of COVID -19 patient’s severity of clinical symptoms.

**Selection of patients:** The study will include hospitalized adult patients participants (≥ 18 years) with confirmed SARS- COV-2 infection, from NIID following informed written consent, within the first 7 days of illness of COVID-19.xix

**Study design:** Simple randomized open label study.

**Study set up:** NIID

Simple random sampling will be used to select the patients by electronic randomization (random e-numbers will be generated by using Research randomiser software) from the participants who are satisfying the eligible criteria

**Sample size** is calculated by using the following n = (Zα/2+Zβ)2 *2*σ2 / d2

{Where Zα/2 is the critical value of the Normal distribution at α/2 (confidence level of 95%, α

is 0.05 and the critical value is 1.96), Zβ is the critical value of the Normal distribution at β (power of 80%, β is 0.2 and the critical value is 0.84), σ2 is the population variance is 6.5,xx and d is the difference to detect.xxi

n = (1.96+0.84) ^2*2*(6.5^2/3^2)

=73

(By adding a non-respond rate of 5%), Given an anticipated dropout rate of 5%, the sample size needed per group.76.

# Inclusion and Exclusion.

**Inclusion criteria:** Only mild symptomaticxxii PCR positive individuals aged above 18 who will give voluntary consent for participation.

# Exclusion criteria:

- - Age’s below18years
  - Pregnant and feeding mothers
  - Those with severe and moderate illness (COVID 19)
  - Chronic Liver Cell Disease (CLCD), Chronic Kidney Disease (CKD)
  - Patients who cannot give their voluntary consent.
  - Those who are unable to take the drug orally
  - Data Collection storage:

Data collection will be done in the ward by interviewing patients, from Bed Head Tickets (BHT) and from investigation reports. Wards in the NIID have facilities to communicate with patients while taking the necessary precautions. Data will be stored for 3 years. Samples will be destroyed using the universal waste disposal methods that are currently practiced at the laboratory of the department of Immunology and Molecular Medicine in disposing of all the infectious waste from COVID-19 samples.

A serial number system will be assigned to identify each patient and the patient data will be entered in a database where only the patient serial number will be used. Names and addresses will not be recorded in the database. Personal patient identification data will be collected and stored separately, as for the purpose if in case we need to contact these individuals, for any treatment purposes only the personal data will be utilized.

The database will be kept secure and will have proper backups. Only the PI of the study will have access to the personal details of the patients.

# Maintenance of patient confidentiality

A serial number will be used to identify the patient and the patient data will be entered in a database where only the patient serial number will be used. Names and addresses will not be recorded in the database. Personal patient identification data will be collected and stored separately. Patients’ confidentiality will be kept much secured.

# Patient follow up

All patients will be closely monitored during the trial daily for assessment as standard management of patients with Covid 19 infection. Fever, Cough Sore throat, Anorexia and dysgeusia, Anosmia, Dyspnoea, Myalgia, pulse,the blood pressure and Oxygen saturation using pulse oxymeter’ will be recorded.

The patient will also be contacted for a follow up visit, on the 28th day after the onset of illness, to assess the general wellbeing. At the follow up any complaints (if any) will be recorded

# TRIAL PROCEDURES 8.1Recruitment:

Patients, who are confirmed PCR positive, COVID 19 infection, who fulfil the inclusion criteria and who do not have the exclusion criteria will be approached by either one of the investigators from Bandaranaike Memorial Ayurveda Research Institute, who will be specially trained in obtaining proper consent. Consent will be sought from all confirmed cases after explaining the trial and those who extend their voluntary consent will be included in the study.

Patients who have mild illness during the first week of illness (within the first 7 days) according to WHO ordinal outcome scale will be included in this study. However, if they develop moderate or severe illness during the course of the study, then the treatment will be stopped but the patients will be followed up and all the data will be collected to record.

# Informed Consent

Consent will be taken by one of the investigators in the team, who have completed GCP training. The patients will be given the patient information sheets of the study and will be given an opportunity to discuss their concerns/questions with a member of the team of investigators. Once the patient is satisfied with the information given to him/her, he/she will be given the opportunity to join the study or to decline. They will be made aware that their decision will in no way affect their other treatment, and that they are free to withdraw at any time

# Randomization

The electronic randomization will be designed by the statistician and he will be responsible for providing the randomization codes. ‘DK will be given to the study group in addition to standard treatment and the control group will be given only the standard treatment. Once the patients are enrolled to the study a serial number is assigned in a chronological order for data entering purposes. Total number of patients will be152 and all will be treated according to the current protocols published by the Ministry of Health, Sri Lanka. The study groups will receive 1250mg of DK, three times a day for 10 days, in addition to the treatment guidelines. This code number will be entered in the data collection sheet along with the patient’s serial number.

# Base line assessment

At the initial visit a detailed clinical history will be taken regarding the clinical features and basic demographic details such as age and gender will be recorded. A details medical history regarding past illnesses such as presence of diabetes, hypertension, hyperlipidaemia, asthma and other allergic diseases along with existing liver and kidney failure will be assessed. A detailed medical examination will be done and the temperature, heart rate, blood pressure, will also be recorded.

# Definition of end of trial

The trial will end at the last follow up day of the last participant.

# INVESTIGATIONAL MEDICINAL PRODUCT (IMP)

- 1. **IMP Description-Desandun Kalka or Ratha Kalka (DK)**

The ingredients of DK poly herbal medicine are;

Dolichos biflous Linn. - Kollu Glycyrrhiza glabra Linn. - Welmee Acorus calamus Linn. ` - Wadakaha Ptrocarpus santalinus Linn. - Rathandun Santalum album Linn. - Suduhandun Rock salt - Savindalunu

- - - Fine powder of all above herbal ingredients in equal parts and rock salt five parts are taken for authentication of ingredients and purification will be done, and after mixing, these are ground with lime juice which is an equal portion of the dry ingredients (*Citrus medica*) is ,added to make it into form of Kalka (paste).xxiii, xxiv
    - The drug will appear as a 1250mg preparation
    - Patients in the test groups will be given a daily dose of a 1250mg, thrice a day orally starting from the day of recruitment upto 10 days with standard treatment
    - The control group will receive standard management alone as guided by circular issued by Ministry of Health will be carried out.
    - As the drug can only be administered orally it will only be given to patients who are able to take drugs orally. At any time point during the study the patient becomes ill and cannot take the drug orally the patient will be taken out of the study. All data collected until the point of withdrawal or until the point of inability to take oral medication will be used in the analysis.

At the 10th day, when the patient is discharged, he or she will be asked to visit for a follow up assessment on 28th day.

# Storage of IMP

The trial drugs (DK) will be prepared with consistency in BMARI pharmacy and stored in pre packed envelopes in a designated cupboard at the BMARI pharmacy.

# 9.3 Compliance with Trial Treatment

The medical officer who offers the drug to the patient will observe the patient taking the first dose of the drug. If the patient wishes not to take the drug at any time point in the study he/she will be taken out of the study.

# Concomitant Medication

- Any patients on regular treatment for diseases such as hypertension, diabetes, asthma or any other chronic illness will be asked to take the medication as usualThey will also take any other medicines such as paracetamol prescribed by the treating physicians as per national Guidelines issued by Ministry of Health Over the counter medications will not be permitted.

# Post-trial Treatment

There will not be any provision to continue use of the drug once the trial ends.

# SAFETY REPORTING

Data Safety Monitoring Committee (DSMC)

This clinical trial will be monitored by a Data and Safety Monitoring Board (DSMB) which will comprise of the following members:

1. Prof. Saroj Jayasinghe: Chair Professor of Medicine,.Former Head, Department of Medical Humanities ,University of Colombo.
2. Dr. Swarna Kaluthotage: Bandaranaike Memorial Ayurveda Research Institute,Nawinna.
3. Dr. T.C.J Senaratne: Bandaranaike Memorial Ayurveda Research Institute,Nawinna.

# STATISTICS

- 1. **The Number of Participants**

Sample size is calculated by using the following formula n = (Zα/2+Zβ)2 *2*σ2 / d2

{where Zα/2 is the critical value of the Normal distribution at α/2 (confidence level of 95%, α

is 0.05 and the critical value is 1.96), Zβ is the critical value of the Normal distribution at β (power of 80%, β is 0.2 and the critical value is 0.84), σ2 is the population variance is 6.5,xxv and d is the difference to detect.xxvi}

n = (1.96+0.84) ^2*2*(6.5^2/3^2)

=73

(By adding a non-respond rate of 5%), given an anticipated dropout rate of 5%, the sample size needed per group is 76 and the total no in both group is 152.

# Procedure for Accounting for Missing, Unused, and Spurious Data.

Missing data will be described, for example, by presenting the number and percentage of individuals in the missing category. All data collected on data collection forms will be used, since only essential data items will be collected. No data will be considered spurious in the analysis since all data will be checked and cleaned before analysis.

# Inclusion in Analysis

All randomized participants, all dosed participants, and all eligible participants will be included. If and when a patient is un blinded that patient will not be included in the analysis. Any data from a patient who is lost to follow up will be included until that point.

# Procedures for Reporting any Deviation(s) from the Original Statistical Plan

Deviations from the original statistical plan are unlikely. However, should they occur, then approval for such changes will be sought from the ERC and these changes will be reported in the final report and papers.

# DATA MANAGEMENT

# Source Data

Source documents are where data are first recorded, which the data collection form (Annexure 1). The data will be obtained by direct interview of the patient by one of the investigators and also by accessing the hospital clinical records and laboratory reports.

All documents will be stored safely in confidential conditions. On all trial-specific documents, other than the signed consent, the participant will be referred to by the trial participant number/code and not by name.

# Access to Data

Direct access will be granted to authorised representatives from the Sponsor, host institution and the regulatory authorities to permit trial-related monitoring, audits and inspections.

# Data Recording and Record Keeping

All trial data will be entered on to paper (data collection forms) and subsequently entered to data base in the main computer at the BMARI The participants will be identified by a unique trial specific number and/or code in any database. The name and any other identifying detail will NOT be included in any trial data electronic file.

# QUALITY ASSURANCE PROCEDURES

The trial will be conducted in accordance with the current approved protocol, GCP, relevant regulations and standard operating procedures.

Regular monitoring will be performed according to GCP. Data will be evaluated for compliance with the protocol and accuracy in relation to source documents. Following written standard operating procedures, the monitors will verify that the clinical trial is conducted and data are generated, documented and reported in compliance with the protocol, GCP and the applicable regulatory requirements.

# SERIOUS BREACHES

A serious breach is defined as “A breach of GCP or the trial protocol which is likely to affect to a significant degree.

1. The safety or physical or mental integrity of the subjects of the trial; or
2. The scientific value of the trial”.

In the event that we suspect a serious breach is suspected the Sponsor must be contacted within 1 working day. In collaboration with the Collaborative Investigators the serious breach will be reviewed by the Sponsor and, if appropriate, the Sponsor will report it to the ERC committee,

# ETHICAL AND REGULATORY CONSIDERATIONS

# Declaration of Helsinki

We will ensure that this trial is conducted in accordance with the principles of the Declaration of Helsinki. We will also ensure that this trial is conducted in accordance with relevant regulations and with Good Clinical Practice.

# Approvals

The protocol, informed consent form, participant information sheet will be submitted to the Ethics Review Committee (ERC), for written approval. We will submit and, where necessary, obtain approval from the above party for all substantial amendments to the original approved documents.

# Reporting

We will submit progress reports of the clinical trial to the ERC at the end of Trial notification and final report will be submitted to the ERC.

# Participant Confidentiality

The trial staff will ensure that the participants’ anonymity is maintained. The participants will be identified only by a participant ID number on all trial documents and any electronic database. All documents will be stored securely and only accessible by trial staff and authorized personnel. The trial will comply with the Data Protection Act, which requires data to be anonymized as soon as it is practical to do so.

# Expenses and Benefits

Benefits for the patients for taking part in the study (immediate)

Information generate from this study will give us a clear and proven efficacy on COVID-19 management and assessment of the immunity response to the poly herbal preparation ,DK will leave sides to go for further application where immunity modulation is expected and also can be utilize for treatment protocol developments.

# Conflicts of interest

All the individuals participating as investigators in this study do not have any conflicts of interest to declare relevant to this study.

# FINANCE

Funding will be provided by the Department of Ayurveda

# PUBLICATION POLICY

The data of this trial will be presented at relevant meetings and will be published at reputed international journals. All data will be made available.

# REFERENCES

1. Worldometer: COVID -19CORONAVIRUS PANDEMIC, updated December 8th

,2020, 0026 GMT

Heidi Ledford, 2020, Corona virus breakthrough: dexamethasone is first drug shown to save lives, Nature, 16. 06. 2020

1. A.P.G. Amarasinghe (2011) Scientific studies of a popular Sri Lanka indigenous therapeutic agent “ Ratha kalka” used in paediatric practice, Sri Lanka Journal of Indigenous Medicine;1:44-48
2. A.P.G.Amarasinghe, N.C.Arya (2000): Toxicity study of an Ayurvedic recipe Rathakalka, proceedings of the 56th Annual Session of the Sri Lanka Association for the Advancement of Science, p.35
3. Amarasinghe APG, Mendis MGU, Preliminary study of anti-inflammatory effect of Ayurvedic recipe, Rathakalka, Proceedings of the 56th Annual Session of the Sri Lanka Association for the Advancement of Science, 2000, p 42
4. Amarasinghe APG, Nageeb BM, Antipyretic effect of an AYurvedic recipe Rathakalka. Proceedings of the 59th Annual Session of the Sri Lanka Association for the Advancement of Science, 2003, p1
5. Amarasinghe APG, Widanapathirana S, Preliminary study of anti- bacterial effect of an Ayurvedic recipe Rathakalka, Indian journal of Research in Ayurvda and Siddha, 2005;4:1-5
6. Nageeb BM, Amarasinghe APG, Widanapathirana S. A study of total viable count of microorganisms and specific microorganisms in the compound preparation of Rathakalka, Ayurveda Sameekshava 2010: II/VI, 205-8.
7. Water extract of licorice had anti-viral activity against human respiratory syncytial virus in human respiratory tract cell lines Chia Feng Yeh a , Kuo Chih Wang a , Lien Chai Chiang b , Den En Shieh c , Ming Hong Yen d , Jung San Chang.2007.
8. O.Yu.Selyutina, N.E.Polyakov. Glycyrrhizic acid as a multifunctional drug carrier – From physicochemical properties to biomedical applications: A modern insight on the ancient drug. International Journal of Pharmaceutics. Volume 559, 25 March 2019, Pages 271-279. <https://doi.org/10.1016/j.ijpharm.2019.01.047>
9. Shen LW, Mao HJ, Wu YL, Tanaka Y, Zhang W. TMPRSS2: a potential target for treatment of influenza virus and coronavirus infections. *Biochimie.* (2017) 142:1–10. doi10.1016/j.biochi.2017.07.016
10. [PubMed Abstract](http://www.ncbi.nlm.nih.gov/sites/entrez?Db=pubmed&Cmd=ShowDetailView&TermToSearch=28778717) | [CrossRef Full Text](https://doi.org/10.1016/j.biochi.2017.07.016) | [Google Scholar](http://scholar.google.com/scholar_lookup?author=LW.%2BShen&author=HJ.%2BMao&author=YL.%2BWu&author=Y.%2BTanaka&author=W.%2BZhang%2B&publication_year=2017&title=TMPRSS2%3A%2Ba%2Bpotential%2Btarget%2Bfor%2Btreatment%2Bof%2Binfluenza%2Bvirus%2Band%2Bcoronavirus%2Binfections&journal=Biochimie.&volume=142&pages=1-10)
11. Harald Murck. Symptomatic Protective Action of Glycyrrhizin (Licorice) in COVID- 19 Infection? Front. Immunol., 28 May 2020

| <https://doi.org/10.3389/fimmu.2020.01239>.

1. T.K.Lim, (2015) Glycyrrhiza glabra, Nature public health emergency collection, 354- 457.
2. Cristina Fiore1 , Michael Eisenhut2 *, Rea Krausse3 , Eugenio Ragazzi4 , Donatella Pellati1 , Decio Armanini1 and Jens Bielenberg5: REVIEW ARTICLE :Antiviral Effects of Glycyrrhiza species; Phytother. Res. 22, 141–148 (2008) ,20 September 2007 in Wiley InterScience .
3. The protective effect of the Vacha rhizome extract on chronic stress-induced immunodeficiency in rat;[H. N. Sarjan,](https://www.tandfonline.com/author/Sarjan%2C%2BH%2BN)[S. Divyashree](https://www.tandfonline.com/author/Divyashree%2C%2BS) &[H. N. Yajurvedi](https://www.tandfonline.com/author/Yajurvedi%2C%2BH%2BN).Pages 1358- 1367 | Received 26 Jul 2016, Accepted 28 Feb 2017, Published online: 17 Mar 2017.
4. COVID-19 and anosmia: A review based on up-to-date knowledge ; Meng et al, Am J Otolaryngology, , Kunming 650500, PR China, Published on [https://www.elsevier.com/locate/amjoto; Science](https://www.elsevier.com/locate/amjoto%3B%20Science) Direct,2020.

xvii A Randomized, Double-blind, Placebo-Controlled, Phase 2 Study to Evaluate the Efficacy and Safety of LY3819253 in Participants with Mild to Moderate COVID-19 Illness Protocol Number: J2W-MC-PYAB.

xviii Olfactory Device for Large Scale Pre-screening for COVID-19,Prasanna Gandhi, Ratnesh Bafna, Girish Arabale,, Sunu Engineer, Sanjay PhadkeSpringerLink, 26th February 2020

1. ACCORD: A Multicentre, Seamless, Phase 2 Adaptive Randomisation Platform Study to Assess the Efficacy and Safety of Multiple Candidate Agents for the Treatment of COVID-19 in Hospitalised Patients: A structured summary of a study protocol for a randomised controlled trial. Tom Wilkinson *et al*,on behalf of the ACCORD Collaborators,BMC publication(2020) ,21:691
2. Clinical and Epidemiological Characteristics and Outcome of Patients With Covid-19 in Sri Lanka; Meththananda Herath *et al* ,An Observational Study, Research Square,2020
3. Rosner, B., (2015). *Fundamentals of Biostatistics*. 8th ed. USA: Cengage Learning.
4. Page 307 Equation 8.24 ;
5. WHO ordinal Scale for Clinical Improvements;COVID 19 Therapeutic Trial Synopsis,February 18,2020,Geneva,Switzerland.
6. De Alwis ES Ayalapperuma, Watika Prakranaya, 1st Edition, Granthaprakaranaya Press, Colombo, 1877
7. Ayurveda Pharmacopeia, Vol I, Part I, Department of Ayurveda, Sri Lanka 1970.
