# Supplementary material for: Preliminary evaluation of the efficacy and safety of a traditional poly-herbal preparation “Desadun Kalka” in reducing symptoms and inflammatory mediators in patients with acute COVID-19
Source: Research Square preprint supplement (doi:10.21203/rs.3.rs-5966181/v1), 2025-02-27
Supplement: Supplementary file 2 [file fc1299c3177dd03aa694a112.xlsx]

## Sheet: Data sheet
Serial No	BHT	Group	Age	Gender	Day of illness at recruitment	Duration of Fever	Fever Day 1 of illness	Fever Day 2 of illness	Fever Day 3 of illness	Fever Day4 of illness	Fever Day 5of illness	Fever Day 6 of illness	Fever Day 7 of illness	Fever Day 8 of illnes	Fever Day 9 of illness	Fever Day 10 of illness	Duartion of cold	Cold Day1 of illness	Cold Day 2 of illness	Cold- Day 3 of illness	Cold Day 4 of illness	Cold- Day 5 ofnillness	Cold Day 6 of illness	Cold Day7 of illness	Cold Day 8 of illness	Cold- Day 9 of illness	Cold- Day 10 of illness	Duration Cough	Cough Day 1of illness	Cough Day2 of illness	Cough Day3 of illness	Cough Day4 of illness	Cough Day5 of illness	Cough Day 6 of illness	Cough Day7 of illness	Cough Day 8 of illness	Cough Day 9 of illness	Cough Day 10 of illness	Duration of headache	Headache Day1 of illness	Headache Day2 of illness	Headache Day3 of illness	Headache Day4 of illness	Headache Day5 of illness	Headache Day6 of illness	Headache Day7 of illness	Headache Day 8 of illness	Headache Day 9 of illness	Headache Day10 of illness
1	2224	1	4	2	D3	8	1	1	1	1	1	1	1	1	0	0	0	0	0	0	0	0	0	0	0	0	0	0	0	0	0	0	0	0	0	0	0	0	8	1	1	1	1	1	1	1	1	0	0
2	2254	1	3	1	D4	0	0	0	0	0	0	0	0	0	0	0	0	0	0	0	0	0	0	0	0	0	0	7	1	1	1	1	1	1	1	0	0	0	6	1	1	1	1	1	1	0	0	0	0
3	2262	1	3	1	D3	7	1	1	1	1	1	1	1	0	0	0	0	0	0	0	0	0	0	0	0	0	0	7	1	1	1	1	1	1	1	0	0	0	7	1	1	1	1	1	1	1	0	0	0
4	2268	0	4	1	D4	9	1	1	1	1	1	1	1	1	1	0	6	1	1	1	1	1	1	0	0	0	0	5	1	1	1	1	1	0	0	0	0	0	5	1	1	1	1	1	0	0	0	0	0
5	2269	0	1	1	D3	7	1	1	1	1	1	1	1	0	0	0	0	0	0	0	0	0	0	0	0	0	0	7	1	1	1	1	1	1	1	0	0	0	7	1	1	1	1	1	1	1	0	0	0
6	2284	0	3	1	D4	6	1	1	1	1	1	1	0	0	0	0	0	0	0	0	0	0	0	0	0	0	0	0	0	0	0	0	0	0	0	0	0	0	0	0	0	0	0	0	0	0	0	0	0
7	2295	1	4	1	D4	7	1	1	1	1	1	1	1	0	0	0	0	0	0	0	0	0	0	0	0	0	0	7	1	1	1	1	1	1	1	0	0	0	0	0	0	0	0	0	0	0	0	0	0
8	2296	1	2	2	D4	0	0	0	0	0	0	0	0	0	0	0	0	0	0	0	0	0	0	0	0	0	0	7	1	1	1	1	1	1	1	0	0	0	0	0	0	0	0	0	0	0	0	0	0
9	3089	1	1	1	D4	7	1	1	1	1	1	1	1	0	0	0	7	1	1	1	1	1	1	1	0	0	0	7	1	1	1	1	1	1	1	0	0	0	7	1	1	1	1	1	1	1	0	0	0
10	3097	0	3	1	D4	0	0	0	0	0	0	0	0	0	0	0	0	0	0	0	0	0	0	0	0	0	0	10	1	1	1	1	1	1	1	1	1	1	0	0	0	0	0	0	0	0	0	0	0
11	3114	0	4	2	D1	0	0	0	1	1	1	1	1	0	0	0	0	0	0	0	0	0	0	0	0	0	0	0	0	0	0	0	0	0	0	0	0	0	0	0	0	0	0	0	0	0	0	0	0
12	3182	1	3	1	D1	0	0	0	0	0	0	0	0	0	0	0	5	1	1	1	1	1	0	0	0	0	0	5	1	1	1	1	1	0	0	0	0	0	5	1	1	1	1	1	0	0	0	0	0
13	3211	0	1	2	D3	0	0	0	0	0	0	0	0	0	0	0	0	0	0	0	0	0	0	0	0	0	0	0	0	0	0	0	0	0	0	0	0	0	0	0	0	0	0	0	0	0	0	0	0
14	3261	0	4	2	D1	0	0	0	0	0	0	0	0	0	0	0	0	0	0	0	0	0	0	0	0	0	0	0	0	0	0	0	0	0	0	0	0	0	0	0	0	0	0	0	0	0	0	0	0
15	3336	1	2	2	D3	0	0	0	0	0	0	0	0	0	0	0	5	1	1	1	1	1	0	0	0	0	0	0	0	0	0	0	0	0	0	0	0	0	5	1	1	1	1	1	0	0	0	0	0
16	3371	1	3	1	D4	0	0	0	0	0	0	0	0	0	0	0	7	1	1	1	1	1	1	1	0	0	0	5	1	1	1	1	1	0	0	0	0	0	0	0	0	0	0	0	0	0	0	0	0
17	3385	1	4	2	D3	4	1	1	1	1	0	0	0	0	0	0	0	0	0	0	0	0	0	0	0	0	0	7	1	1	1	1	1	1	1	0	0	0	0	0	0	0	0	0	0	0	0	0	0
18	3415	0	3	1	D4	8	1	1	1	1	1	1	1	1	0	0	0	0	0	0	0	0	0	0	0	0	0	8	1	1	1	1	1	1	1	1	0	0	0	0	0	0	0	0	0	0	0	0	0
19	3430	1	4	2	D2	0	0	0	0	0	0	0	0	0	0	0	0	0	0	0	0	0	0	0	0	0	0	4	1	1	1	1	0	0	0	0	0	0	0	0	0	0	0	0	0	0	0	0	0
20	3617	1	3	1	D4	5	1	1	1	1	1	0	0	0	0	0	0	0	0	0	0	0	0	0	0	0	0	5	1	1	1	1	1	0	0	0	0	0	0	0	0	0	0	0	0	0	0	0	0
21	3679	0	0	1	D3	5	1	1	1	1	1	0	0	0	0	0	5	1	1	1	1	1	0	0	0	0	0	0	0	0	0	0	0	0	0	0	0	0	0	0	0	0	0	0	0	0	0	0	0
22	3685	0	2	2	D4	0	0	0	0	0	0	0	0	0	0	0	0	0	0	0	0	0	0	0	0	0	0	8	1	1	1	1	1	1	1	1	0	0	0	0	0	0	0	0	0	0	0	0	0
23	3723	0	3	2	D3	6	1	1	1	1	1	1	0	0	0	0	0	0	0	0	0	0	0	0	0	0	0	10	1	1	1	1	1	1	1	1	1	1	0	0	0	0	0	0	0	0	0	0	0
24	3728	0	4	2	D4	0	0	0	0	0	0	0	0	0	0	0	0	0	0	0	0	0	0	0	0	0	0	10	1	1	1	1	1	1	1	1	1	1	0	0	0	0	0	0	0	0	0	0	0
25	3732	0	4	2	D4	0	0	0	0	0	0	0	0	0	0	0	0	0	0	0	0	0	0	0	0	0	0	0	0	0	0	0	0	0	0	0	0	0	0	0	0	0	0	0	0	0	0	0	0
26	3753	1	4	1	D4	0	0	0	0	0	0	0	0	0	0	0	0	0	0	0	0	0	0	0	0	0	0	4	1	1	1	1	0	0	0	0	0	0	0	0	0	0	0	0	0	0	0	0	0
27	3755	0	2	2	D3	0	0	0	1	0	0	0	0	0	0	0	0	0	0	0	0	0	0	0	0	0	0	0	0	0	0	0	0	0	0	0	0	0	0	0	0	0	0	0	0	0	0	0	0
28	3758	0	0	2	D3	0	0	0	0	0	0	0	0	0	0	0	0	0	0	0	0	0	0	0	0	0	0	0	0	0	0	0	0	0	0	0	0	0	6	1	1	1	1	1	1	0	0	0	0
29	3779	0	2	2	D4	6	1	1	1	1	1	1	0	0	0	0	7	1	1	1	1	1	1	1	0	0	0	7	1	1	1	1	1	1	1	0	0	0	5	1	1	1	1	1	0	0	0	0	0
30	3876	0	4	2	D3	7	1	1	1	1	1	1	1	0	0	0	0	0	0	0	0	0	0	0	0	0	0	7	1	1	1	1	1	1	1	0	0	0	5	1	1	1	1	1	0	0	0	0	0
31	3801	0	3	1	D2	3	1	1	1	0	0	0	0	0	0	0	0	0	0	0	0	0	0	0	0	0	0	0	0	1	1	0	0	0	0	0	0	0	0	0	0	0	0	0	0	0	0	0	0
32	4406	0	1	2	D3	6	1	1	1	1	1	1	0	0	0	0	0	0	0	0	0	0	0	0	0	0	0	7	1	1	1	1	1	1	1	0	0	0	0	0	0	0	0	0	0	0	0	0	0
33	4485	1	4	2	D4	6	1	1	1	1	1	1	0	0	0	0	0	0	0	0	0	0	0	0	0	0	0	7	1	1	1	1	1	1	1	0			0	0	0	0	0	0	0	0	0	0	0
34	4554	1	1	1	D4	7	1	1	1	1	1	1	1	0	0	0	0	0	0	0	0	0	0	0	0	0	0	7	1	1	1	1	1	1	1	0	0	0	0	0	0	0	0	0	0	0	0	0	0
35	4900	1	4	2	D4	6	1	1	1	1	1	1	0	0	0	0	0	0	0	0	0	0	0	0	0	0	0	0	0	0	0	0	0	0	0	0	0	0	0	0	0		0	0	0	0	0	0	0
36	4983	0	4	2	D3	7	1	0	1	1	1	1	1	0	0	0	0	0	0	0	0	0	0	0	0	0	0	7	1	1	1	1	1	1	1	0	0	0	0	0	0	0	0	0	0	0	0	0	0
37	4987	1	3	2	D4	5	1	1	1	1	1	0	0	0	0	0	0	0	0	0	0	0	0	0	0	0	0	0	0	0	0	0	0	0	0	0	0	0	0	0	0	0	0	0	0	0	0	0	0
38	4992	1	4	2	D4	0	0	0	0	0	0	0	0	0	0	0	6	1	1	1	1	1	1	0	0	0	0	6	1	1	1	1	1	1	0	0	0	0	0	0	0	0	0	0	0	0	0	0	0
39	5013	0	4	2	D3	0	0	0	0	0	0	0	0	0	0	0	0	0	0	0	0	0	0	0	0	0	0	9	1	1	1	1	1	1	1	1	1	0	0	0	0	0	0	0	0	0	0	0	0
40	5018	0	3	2	D3	8	1	1	1	1	1	1	1	1	0	0	9	1	1	1	1	1	1	1	1	1	0	9	1	1	1	1	1	1	1	1	1	0	0	0	0	0	0	0	0	0	0	0	0
41	5024	0	4	1	D3	0	0	0	0	0	0	0	0	0	0	0	0	0	0	0	0	0	0	0	0	0	0	8	1	1	1	1	1	1	1	1	0	0	0	0	0	0	0	0	0	0	0	0	0
42	5027	0	4	1	D2	0	0	0	0	0	0	0	0	0	0	0	0	0	0	0	0	0	0	0	0	0	0	3	1	1	1	0	0	0	0	0	0	0	7	1	1	1	1	1	1	1	0	0	0
43	5034	0	2	2	D4	7	0	1	1	1	1	1	1	0	0	0	10	1	1	1	1	1	1	1	1	1	1	0	1	0	0	0	0	0	0	0	0	0	0	0	0	0	0	0	0	0	0	0	0
44	5044	1	1	1	D4	0	0	0	0	0	0	0	0	0	0	0	0	0	0	0	0	0	0	0	0	0	0	7	1	1	1	1	1	1	1	0	0	0	0	0	0	0	0	0	0	0	0	0	0
45	5051	1	3	1	D4	0	0	0	0	0	0	0	0	0	0	0	0	0	0	0	0	0	0	0	0	0	0	0	0	0	0	1	1	1	0	0	0	0	0	0	0	0	0	0	0	0	0	0	0
46	5088	1	4	1	D3	3	1	1	1	0	0	0	0	0	0	0	0	0	0	0	0	0	0	0	0	0	0	4	1	1	1	1	0	0	0	0	0	0	3	1	1	1	0	0	0	0	0	0	0
47	5089	1	2	1	D3	4	1	1	1	1	0	0	0	0	0	0	0	0	0	0	0	0	0	0	0	0	0	4	1	1	1	1	0	0	0	0	0	0	4	1	1	1	1	0	0	0	0	0	0
48	5128	1	3	2	D4	6	1	1	1	1	1	1	0	0	0	0	0	0	0	0	0	0	0	0	0	0	0	7	1	1	1	1	1	1	1	0	0	0	4	1	1	1	1	0	0	0	0	0	0
49	5129	1	3	1	D4	4	1	1	1	1	0	0	0	0	0	0	6	1	1	1	1	1	1	0	0	0	0	8	1	1	1	1	1	1	1	1	0	0	0	0	0	0	0	0	0	0	0	0	0
50	5135	1	4	2	D4	0	0	0	0	0	0	0	0	0	0	0	0	0	0	0	0	0	0	0	0	0	0	6	1	1	1	1	1	1	0	0	0	0	0	0	0	0	0	0	0	0	0	0	0
51	5138	1	3	2	D3	0	0	0	0	0	0	0	0	0	0	0	0	0	0	0	0	0	0	0	0	0	0	6	1	1	1	1	1	1	0	0	0	0	0	0	0	0	0	0	0	0	0	0	0
52	5159	1	4	1	D3	4	1	1	1	1	0	0	0	0	0	0	0	0	0	0	0	0	0	0	0	0	0	5	1	1	1	1	1	0	0	0	0	0	0	0	0	0	0	0	0	0	0	0	0
53	5163	0	4	1	D4	5	1	1	1	1	1	0	0	0	0	0	0	0	0	0	0	0	0	0	0	0	0	0	0	0	0	0	0	0	0	0	0	0	0	0	0	0	0	0	0	0	0	0	0
54	5214	0	3	2	D2	0	0	0	0	0	0	0	0	0	0	0	0	0	0	0	0	0	0	0	0	0	0	6	1	1	1	1	1	1	0	0	0	0	5	1	1	1	1	1	0	0	0	0	0
55	5220	1	3	1	D4	4	1	1	1	1	0	0	0	0	0	0	0	0	0	0	0	0	0	0	0	0	0	4	1	1	1	1	0	0	0	0	0	0	4	1	1	1	1	0	0	0	0	0	0
56	5251	0	4	2	D4	0	0	0	0	0	0	0	0	0	0	0	0	0	0	0	0	0	0	0	0	0	0	7	1	1	1	1	1	1	1	0	0	0	0	0	0	0	0	0	0	0	0	0	0
57	5257	1	3	1	D2	0	0	0	0	0	0	0	0	0	0	0	6	1	1	1	1	1	1	0	0	0	0	7	1	1	1	1	1	1	1	0	0	0	0	0	0	0	0	0	0	0	0	0	0
58	5279	0	4	2	D3	0	0	0	1	0	0	0	0	0	0	0	0	0	0	0	0	0	0	0	0	0	0	10	1	1	1	1	1	1	1	1	1	1	4	1	1	1	1	0	0	0	0	0	0
59	5283	0	0	2	D4	0	0	0	0	0	0	0	0	0	0	0	10	1	1	1	1	1	1	1	1	1	1	10	1	1	1	1	1	1	1	1	1	1	0	0	0	0	0	0	0	0	0	0	0
60	5293	0	4	1	D3	4	1	1	1	1	0	0	0	0	0	0	0	0	0	0	0	0	0	0	0	0	0	7	1	1	1	1	1	1	1	0	0	0	6	1	1	1	1	1	1	0	0	0	0
61	5309	0	4	1	D3	4	1	1	1	1	0	0	0	0	0	0	0	0	0	0	0	0	0	0	0	0	0	5	1	1	1	1	1	0	0	0	0	0	9	1	1	1	1	1	1	1	1	1	0
62	5332	0	4	1	D4	7	1	1	1	1	1	1	1	0	0	0	0	0	0	0	0	0	0	0	0	0	0	9	1	1	1	1	1	1	1	1	1	0	0	0	0	0	0	0	0	0	0	0	0
63	5360	1	2	1	D3	6	1	1	1	1	1	1	0	0	0	0	5	1	1	1	1	1	0	0	0	0	0	0	0	0	0	0	0	0	0	0	0	0	0	0	0	0	0	0	0	0	0	0	0
64	5379	0	4	2	D3	0	0	0	0	0	0	0	0	0	0	0	6	1	1	1	1	1	1	0	0	0	0	0	0	0	0	0	0	0	0	0	0	0	6	1	1	1	1	1	1	0	0	0	0
65	5383	0	1	1	D4	1	1	1	1	1	0	0	0	0	0	0	0	0	0	0	0	0	0	0	0	0	0	9	1	1	1	1	1	1	1	1	1	0	0	0	0	0	0	0	0	0	0	0	0
66	5386	1	2	1	D2	0	0	0	0	0	0	0	0	0	0	0	8	1	1	1	1	1	1	1	1	0	0	0	0	0	0	0	0	0	0	0	0	0	0	0	0	0	0	0	0	0	0	0	0
67	5396	0	4	2	D4	6	1	1	1	1	1	1	0	0	0	0	9	1	1	1	1	1	1	1	1	1	0	8	1	1	1	1	1	1	1	1	0	0	6	1	1	1	1	1	1	0	0	0	0
68	5406	0	4	1	D3	0	0	0	0	0	0	0	0	0	0	0	10	1	1	1	1	1	1	1	1	1	1	0	0	0	0	0	0	0	0	0	0	0	0	0	0	0	0	0	0	0	0	0	0
69	5415	0	3	1	D4	0	0	0	0	1	1	1	1	0	0	0	0	0	0	0	0	0	0	0	0	0	0	9	1	1	1	1	1	1	1	1	1	0	7	1	1	1	1	1	1	1	0	0	0
70	5417	0	1	2	D4	0	0	0	0	0	0	0	0	0	0	0	8	1	1	1	1	1	1	1	1	0	0	7	1	1	1	1	1	1	1	0	0	0	0	0	0	0	0	0	0	0	0	0	0
71	5434	0	4	1	D4	0	0	0	0	0	0	0	0	0	0	0	10	1	1	1	1	1	1	1	1	1	1	10	1	1	1	1	1	1	1	1	1	1	0	0	0	0	0	0	0	0	0	0	0
72	5438	1	1	1	D3	3	1	1	1	0	0	0	0	0	0	0	0	0	0	0	0	0	0	0	0	0	0	7	1	1	1	1	1	1	1	0	0	0	4	1	1	1	1	0	0	0	0	0	0
73	5439	1	4	1	D3	0	0	0	0	0	0	0	0	0	0	0	0	0	0	0	0	0	0	0	0	0	0	6	1	1	1	1	1	1	0	0	0	0	6	1	1	1	1	1	1	0	0	0	0
74	5442	0	4	2	D4	0	0	0	0	0	0	0	0	0	0	0	0	0	0	0	0	0	0	0	0	0	0	10	1	1	1	1	1	1	1	1	1	1	9	1	1	1	1	1	1	1	1	1	0
75	5454	1	4	1	D2	4	1	1	1	1	0	0	0	0	0	0	0	0	0	0	0	0	0	0	0	0	0	6	1	1	1	1	1	1	0	0	0	0	0	0	0	0	0	0	0	0	0	0	0
76	5465	0	2	1	D4	0	0	0	0	1	1	1	1	1	0	0	0	0	0	0	0	0	0	0	0	0	0	5	1	1	1	1	1	0	0	0	0	0	0	0	0	0	0	0	0	0	0	0	0
77	5467	0	2	1	D4	7	1	1	1	1	1	1	1	0	0	0	0	0	0	0	0	0	0	0	0	0	0	7	1	1	1	1	1	1	1	0	0	0	7	1	1	1	1	1	1	1	0	0	0
78	5497	0	2	1	D4	8	1	1	1	1	1	1	1	1	0	0	0	0	0	0	0	0	0	0	0	0	0	10	1	1	1	1	1	1	1	1	1	1	0	1	0	0	0	0	0	0	0	0	0
79	5506	1	1	2	D2	5	1	1	1	1	1	0	0	0	0	0	0	0	0	0	0	0	0	0	0	0	0	0	0	0	0	0	0	0	0	0	0	0	0	0	0	0	0	0	0	0	0	0	0
80	5551	0	3	1	D4	8	1	1	1	1	1	1	1	1	0	0	0	0	0	0	0	0	0	0	0	0	0	10	1	1	1	1	1	1	1	1	1	1	0	0	0	0	0	0	0	0	0	0	0
81	5561	1	4	1	D3	7	1	1	1	1	1	1	1	0	0	0	0	0	0	0	0	0	0	0	0	0	0	4	1	1	1	1	0	0	0	0	0	0	0	0	0	0	0	0	0	0	0	0	0
82	5576	0	3	2	D2	0	0	1	0	0	0	0	0	0	0	0	0	0	0	0	0	0	0	0	0	0	0	0	0	0	0	0	0	0	0	0	0	0	6	1	1	1	1	1	1	0	0	0	0
83	5590	1	4	1	D3	6	1	1	1	1	1	1	0	0	0	0	0	0	0	0	0	0	0	0	0	0	0	8	1	1	1	1	1	1	1	1	0	0	5	1	1	1	1	1	0	0	0	0	0
84	5592	0	3	1	D4	8	1	1	1	1	1	1	1	1	0	0	9	1	1	1	1	1	1	1	1	1	0	9	1	1	1	1	1	1	1	1	1	0	0	0	0	0	0	0	0	0	0	0	0
85	5626	0	2	2	D3	0	0	0	0	0	0	0	0	0	0	0	10	1	1	1	1	1	1	1	1	1	1	0	0	0	0	0	0	0	0	0	0	0	0	0	0	0	0	0	0	0	0	0	0
86	5627	0	2	2	D3	0	0	0	0	0	0	0	0	0	0	0	9	1	1	1	1	1	1	1	1	1	0	9	1	1	1	1	1	1	1	1	1	0	0	0	0	0	0	0	0	0	0	0	0
87	5672	1	4	1	D3	0	0	0	0	0	0	0	0	0	0	0	0	0	0	0	0	0	0	0	0	0	0	7	1	1	1	1	1	1	1	0	0	0	6	1	1	1	1	1	1	0	0	0	0
88	5676	0	4	1	D3	7	1	1	1	1	1	1	1	0	0	0	8	1	1	1	1	1	1	1	1	0	0	9	1	1	1	1	1	1	1	1	1	0	0	0	0	0	0	0	0	0	0	0	0
89	5701	0	3	1	D3	5	1	1	1	1	1	0	0	0	0	0	0	0	0	0	0	0	0	0	0	0	0	8	1	1	1	1	1	1	1	1	0	0	0	0	0	0	0	0	0	0	0	0	0
90	5718	0	3	2	D4	6	1	1	1	1	1	1	0	0	0	0	8	1	1	1	1	1	1	1	1	0	0	8	1	1	0	1	1	1	1	1	0	0	0	0	0	0	0	0	0	0	0	0	0
91	5739	1	2	1	D3	6	1	1	1	1	1	1	0	0	0	0	5	1	1	1	1	1	0	0	0	0	0	5	1	1	1	1	1	0	0	0	0	0	0	0	0	0	0	0	0	0	0	0	0
92	5780	0	3	1	D4	7	1	1	1	1	1	1	1	0	0	0	0	0	0	0	0	0	0	0	0	0	0	9	1	1	0	1	1	1	1	1	1	0	0	0	0	0	0	0	0	0	0	0	0
93	5807	1	4	2	D3	0	0	0	0	0	0	0	0	0	0	0	8	1	1	1	1	1	1	1	1	0	0	6	1	1	1	1	1	1	0	0	0	0	0	0	0	0	0	0	0	0	0	0	0
94	5813	1	3	2	D4	4	1	1	1	1	0	0	0	0	0	0	5	1	1	1	1	1	0	0	0	0	0	0	0	0	0	0	0	0	0	0	0	0	0	0	0	0	0	0	0	0	0	0	0
95	5822	0	4	1	D3	6	1	1	1	1	1	0	0	0	0	0	9	1	1	1	1	1	1	1	1	1	0	9	1	1	1	1	1	1	1	1	1	0	0	0	0	0	0	0	0	0	0	0	0
96	5825	0	4	1	D4	9	1	1	1	1	1	1	1	1	1	0	10	1	1	1	1	1	1	1	1	1	1	0	0	0	0	0	0	0	0	0	0	0	10	1	1	1	1	1	1	1	1	1	1
97	5834	0	4	1	D4	9	1	1	1	1	1	1	1	1	1	0	0	0	0	0	0	0	0	0	0	0	0	0	0	0	0	0	0	0	0	0	0	0	0	0	0	0	0	0	0	0	0	0	0
98	5836	1	1	2	D4	0	0	0	0	0	0	0	0	0	0	0	6	1	1	1	1	1	1	0	0	0	0	7	1	1	1	1	1	1	1	0	0	0	0	0	0	0	0	0	0	0	0	0	0
99	5943	1	4	1	D4	5	1	1	1	1	1	0	0	0	0	0	0	0	0	0	0	0	0	0	0	0	0	7	1	1	1	1	1	1	1	0	0	0	0	0	0	0	0	0	0	0	0	0	0
100	5857	0	2	2	D4	0	0	0	0	1	1	1	0	0	0	0	0	0	0	0	0	0	0	0	0	0	0	7	1	1	1	1	1	1	1	0	0	0	0	0	0	0	0	0	0	0	0	0	0
101	5886	0	3	1	D4	4	1	1	1	1	0	0	0	0	0	0	0	0	0	0	0	0	0	0	0	0	0	9	1	1	1	1	1	1	1	1	1	0	0	0	0	0	0	0	0	0	0	0	0
102	5891	1	2	2	D3	0	0	0	0	0	0	0	0	0	0	0	0	0	0	0	0	0	0	0	0	0	0	7	1	1	1	1	1	1	1	0	0	0	6	1	1	1	1	1	1	0	0	0	0
103	5907	0	4	1	D4	6	1	1	1	1	1	1	0	0	0	0	0	0	0	0	0	0	0	0	0	0	0	9	1	1	1	1	1	1	1	1	1	0	7	1	1	1	1	1	1	1	0	0	0
104	5945	1	3	2	D4	0	0	0	0	0	0	0	0	0	0	0	5	1	1	1	1	1	0	0	0	0	0	5	1	1	1	1	1	0	0	0	0	0	7	1	1	1	1	1	1	1	0	0	0
105	5953	1	1	1	D4	6	1	1	1	1	1	1	0	0	0	0	0	0	0	0	0	0	0	0	0	0	0	7	1	1	1	1	1	1	1	0	0	0	0	0	0	0	0	0	0	0	0	0	0
106	5954	1	1	1	D3	0	0	0	0	0	0	0	0	0	0	0	6	1	1	1	1	1	1	0	0	0	0	5	1	1	1	1	1	0	0	0	0	0	0	0	0	0	0	0	0	0	0	0	0
107	5955	1	3	1	D4	5	1	1	1	1	1	0	0	0	0	0	8	1	1	1	1	1	1	1	1	0	0	9	1	1	1	1	1	1	1	1	1	0	0	0	0	0	0	0	0	0	0	0	0
108	5956	0	3	1	D3	4	1	1	1	1	0	0	0	0	0	0	0	0	0	0	0	0	0	0	0	0	0	9	1	1	1	1	1	1	1	1	1	0	0	0	0	0	0	0	0	0	0	0	0
109	5960	0	1	2	D4	6	1	1	1	1	1	1	0	0	0	0	10	1	1	1	1	1	1	1	1	1	1	10	1	1	1	1	1	1	1	1	1	1	6	1	1	1	1	1	1	0	0	0	0
110	5980	0	4	1	D4	6	1	1	1	1	1	1	0	0	0	0	0	0	0	0	0	0	0	0	0	0	0	7	1	1	1	1	1	1	1	0	0	0	8	1	1	1	1	1	1	1	1	0	0
111	5983	1	2	1	D3	4	1	1	1	1	0	0	0	0	0	0	0	0	0	0	0	0	0	0	0	0	0	6	1	1	1	1	1	1	0	0	0	0	6	1	1	1	1	1	1	0	0	0	0
112	6010	1	4	2	D3	3	1	1	1	0	0	0	0	0	0	0	0	0	0	0	0	0	0	0	0	0	0	5	1	1	1	1	1	0	0	0	0	0	0	0	0	0	0	0	0	0	0	0	0
113	6014	1	4	1	D4	0	0	0	0	0	0	0	0	0	0	0	6	1	1	1	1	1	1	0	0	0	0	0	0	0	0	0	0	0	0	0	0	0	6	1	1	1	1	1	1	0	0	0	0
114	6019	1	4	1	D4	6	1	1	1	1	1	1	0	0	0	0	0	0	0	0	0	0	0	0	0	0	0	7	1	1	1	1	1	1	1	0	0	0	0	0	0	0	0	0	0	0	0	0	0
115	6034	0	4	1	D4	0	0	0	0	0	0	0	0	0	0	0	6	1	1	1	1	1	1	0	0	0	0	10	1	1	1	1	1	1	1	1	1	1	6	1	1	1	1	1	1	0	0	0	0
116	6056	1	3	1	D4	5	1	1	1	1	1	0	0	0	0	0	0	0	0	0	0	0	0	0	0	0	0	7	1	1	1	1	1	1	1	0	0	0	7	1	1	1	1	1	1	1	0	0	0
117	6057	0	4	2	D3	4	1	1	1	1	0	0	0	0	0	0	0	0	0	0	0	0	0	0	0	0	0	8	1	1	1	1	1	1	1	1	0	0	0	0	0	0	0	0	0	0	0	0	0
118	6072	1	4	1	D4	2	1	1	0	0	0	0	0	0	0	0	5	1	1	1	1	1	0	0	0	0	0	8	1	1	1	1	1	1	1	1	0	0	4	1	1	1	1	0	0	0	0	0	0
119	6118	1	4	2	D4	0	0	0	0	0	0	0	0	0	0	0	0	0	0	0	0	0	0	0	0	0	0	6	1	1	1	1	1	1	0	0	0	0	0	0	0	0	0	0	0	0	0	0	0
120	6147	0	4	2	D4	0	0	0	0	0	0	0	0	0	0	0	6	1	1	1	1	1	1	0	0	0	0	8	1	1	1	1	1	1	1	1	0	0	0	0	0	0	0	0	0	0	0	0	0
121	6153	1	4	1	D4	5	1	1	1	1	1	0	0	0	0	0	6	1	1	1	1	1	1	0	0	0	0	6	1	1	1	1	1	1	0	0	0	0	0	0	0	0	0	0	0	0	0	0	0
122	6154	1	4	2	D4	0	0	0	0	0	0	0	0	0	0	0	0	0	0	0	0	0	0	0	0	0	0	6	1	1	1	1	1	1	0	0	0	0	0	0	0	0	0	0	0	0	0	0	0
123	6191	1	1	2	D4	0	0	0	0	0	0	0	0	0	0	0	6	1	1	1	1	1	1	0	0	0	0	0	0	0	0	0	0	0	0	0	0	0	0	0	0	0	0	0		0	0	0	0
124	6207	0	4	1	D4	5	1	1	1	1	1	0	0	0	0	0	0	0	0	0	0	0	0	0	0	0	0	0	0	0	0	0	0	0	0	0	0	0	0	0	0	0	0	0	0	0	0	0	0
125	6212	1	4	1	D4	5	1	1	1	1	1	0	0	0	0	0	0	0	0	0	0	0	0	0	0	0	0	6	1	1	1	1	1	1	0	0	0	0	0	0	0	0	0	0	0	0	0	0	0
126	6216	1	3	1	D4	7	1	1	1	1	1	1	1	0	0	0	0	0	0	0	0	0	0	0	0	0	0	8	1	1	1	1	1	1	1	1	0	0	5	1	1	1	1	1	0	0	0	0	0
127	6240	1	3	2	D4	6	1	1	1	1	1	1	0	0	0	0	7	1	1	1	1	1	1	1	0	0	0	7	1	1	1	1	1	1	1	0	0	0	0	0	0	0	0	0	0	0	0	0	0
128	6266	1	4	2	D2	0	0	0	0	0	0	0	0	0	0	0	6	1	1	1	1	1	1	0	0	0	0	6	1	1	1	1	1	1	0	0	0	0	0	0	0	0	0	0	0	0	0	0	0
129	6319	1	3	2	D4	4	1	1	1	1	0	0	0	0	0	0	0	0	0	0	0	0	0	0	0	0	0	9	1	1	1	1	1	1	1	1	1	0	0	0	0	0	0	0	0	0	0	0	0
130	6429	1	3	1	D3	5	1	1	1	1	1	0	0	0	0	0	5	1	1	1	1	1	0	0	0	0	0	5	1	1	1	1	1	0	0	0	0	0	0	0	0	0	0	0	0	0	0	0	0
131	6437	1	4	2	D4	0	0	0	0	0	0	0	0	0	0	0	7	1	1	1	1	1	1	1	0	0	0	0	0	0	0	0	0	0	0	0	0	0	0	0	0	0	0	0	0	0	0	0	0
132	6423	0	2	2	D2	0	0	0	0	0	0	0	0	0	0	0	6	1	1	1	1	1	1	0	0	0	0	0	0	0	0	0	0	0	0	0	0	0	0	0	0	0	0	0	0	0	0	0	0
133	6342	1	4	2	D4	0	0	0	0	0	0	0	0	0	0	0	0	0	0	0	0	0	0	0	0	0	0	7	1	1	1	1	1	1	1	0	0	0	0	0	0	0	0	0	0	0	0	0	0
134	6411	0	4	1	D4	9	1	1	1	1	1	1	1	1	1	0	0	0	0	0	0	0	0	0	0	0	0	10	1	1	1	1	1	1	1	1	1	1	10	1	1	1	1	1	1	1	1	1	1
135	6431	0	4	2	D3	0	0	0	0	0	0	0	0	0	0	0	6	1	1	1	1	1	1	0	0	0	0	0	0	0	0	0	0	0	0	0	0	0	7	1	1	1	1	1	1	1	0	0	0
136	6441	1	4	1	D4	5	1	1	1	1	1	0	0	0	0	0	6	1	1	1	1	1	1	0	0	0	0	5	1	1	1	1	1	0	0	0	0	0	5	1	1	1	1	1	0	0	0	0	0
137	6446	1	3	2	D4	0	0	0	0	0	0	0	0	0	0	0	0	0	0	0	0	0	0	0	0	0	0	8	1	1	1	1	1	1	1	1	0	0	0	0	0	0	0	0	0	0	0	0	0
138	6487	0	20	2	D4	7	1	1	1	1	1	1	1	0	0	0	7	1	1	1	1	1	1	1	0	0	0	0	0	0	0	0	0	0	0	0	0	0	0	0	0	0	0	0	0	0	0	0	0
139	6547	1	4	2	D4	7	1	1	1	1	1	1	1	0	0	0	6	1	1	1	1	1	1	0	0	0	0	7	1	1	1	1	1	1	1	0	0	0	0	0	0	0	0	0	0	0	0	0	0
140	6559	0	4	2	D4	4	1	1	1	1	0	0	0	0	0	0	10	1	1	1	1	1	1	1	1	1	1	9	1	1	1	1	1	1	1	1	1	0	0	0	0	0	0	0	0	0	0	0	0
141	6581	1	3	2	D4	6	1	1	1	1	1	1	0	0	0	0	0	0	0	0	0	0	0	0	0	0	0	6	1	1	1	1	1	1	0	0	0	0	0	0	0	0	0	0	0	0	0	0	0
142	6592	0	4	2	D2	0	0	0	0	0	0	0	0	0	0	0	0	0	0	0	0	0	0	0	0	0	0	9	0	0	0	1	1	1	1	1	1	0	0	0	0	0	0	0	0	0	0	0	0
143	6622	1	4	2	D4	5	1	1	1	1	1	0	0	0	0	0	0	0	0	0	0	0	0	0	0	0	0	5	1	1	1	1	1	0	0	0	0	0	0	0	0	0	0	0	0	0	0	0	0
144	6636	1	3	2	D3	5	1	1	1	1	1	0	0	0	0	0	0	0	0	0	0	0	0	0	0	0	0	9	1	1	1	1	1	1	1	1	1	0	0	0	0	0	0	0	0	0	0	0	0
145	6639	0	3	1	D4	5	1	1	1	1	1	0	0	0	0	0	0	0	0	0	0	0	0	0	0	0	0	3	1	1	1	0	0	0	0	0	0	0	0	0	0	0	0	0	0	0	0	0	0
146	6688	0	4	1	D4	5	1	1	1	1	1	0	0	0	0	0	0	0	0	0	0	0	0	0	0	0	0	7	1	1	1	1	1	1	1	0	0		0	0	0	0	0	0	0	0	0	0	0
147	6701	0	1	1	D4	4	1	1	1	1	0	0	0	0	0	0	0	0	0	0	0	0	0	0	0	0	0	7	1	1	1	1	1	1	1	0	0	0	0	0	0	0	0	0	0	0	0	0	0
148	6720	1	2	1	D4	0	0	0	0	0	0	0	0	0	0	0	0	0	0	0	0	0	0	0	0	0	0	0	0	0	0	0	0	0	0	0	0	0	0	0	0	0	0	0	0	0	0	0	0
149	6730	1	4	1	D4	0	0	0	0	0	0	0	0	0	0	0	7	1	1	1	1	1	1	1	0	0	0	6	1	1	1	1	1	1	0	0	0	0	0	0	0	0	0	0	0	0	0	0	0
150	6732	1	3	2	D2	4	1	1	1	1	0	0	0	0	0	0	4	1	1	1	1	0	0	0	0	0	0	6	1	1	1	1	1	1	0	0	0	0	2	1	1	0	0	0	0	0	0	0	0
151	6751	0	2	2	D4	4	1	1	1	1	0	1	1	0	0	0	0	0	0	0	0	0	0	0	0	0	0	0	0	0	0	0	0	0	0	0	0	0	0	0	0	0	0	0	0	0	0	0	0
152	6785	1	2	1	D2	4	1	1	1	1	0	0	0	0	0	0	5	1	1	1	1	5	0	0	0	0	0	6	1	1	1	1	1	1	0	0	0	0	0	0	0	0	0	0	0	0	0	0	0
[truncated: 109 more columns]

## Sheet: Code
Group	Invention-0	Control-1
Gender	Male-1	Female -2
Age	1(18-28)	2(29-38)	3(39-48)	4(49-68)	5(69-80)
Diabetes Mellitus	Present -1	Absent -0
Dyslipedimea	Present -1	Absent -0
Hypertension	Present -1	Absent -0
Bronchial Asthma	Present -1	Absent -0
Fever	Present -1	Absent -0
Cold	Present -1	Absent -0
Cough	Present -1	Absent-0
Headache	Present -1	Absent-0
Dysphnoea	Present -1	Absent-0
Sore throat	Present-1	Absent-0
Diarrhoea	Present -1	Absent-0
Mylgia	Present -1	Absent-0
Anosmia	Present -1	Absent-0
Vomiting	Present -1	Absent-0
Loss of appetite -	Present -1	Absent-0
Respiratory Rate-	(12-20)-0	(20-30) -1	(<30) -2
O2 saturation	(>94) -0	(90-94 )-1	(<90) -2
WBC
N%- Neutrophil
E%- Eosinophil
M%- Monocyte
B%- Basophil
L%- Lymphocyte
Hb- Hemoglobin
PLT- Platelet
HCT- Hematocrte
